# Supplementary material for: Comprehensive Analysis of Subcellular Localization, Immune Function and Role in Bacterial wilt Disease Resistance of Solanum lycopersicum Linn. ROP Family Small GTPases
Source: MDPI journal article supplement (doi:10.3390/ijms23179727), 2022-08-27
Supplement: s1 [file s1]

Table S1

| Primers for pENTR cloning |                             |
|---------------------------|-----------------------------|
| Primer name               | Sequence (5'-3')            |
| SIrop1-F                  | CACC ATGAATGCTTCAAAGTTCATC  |
| SIrop1-R                  | CTAAGCAACACAGCCTCCACAAACG   |
| SIrop2-F                  | CACC ATGAATGTTTCAAAGTTCATC  |
| SIrop2-R                  | CTAAACAGCAGCACAGCCTCCACAT   |
| SIrop3-F                  | CACC ATGGCCTCAAGTGCTTCAAGA  |
| SIrop3-R                  | TCACTTTAAACAAACGAGCTTCCTT   |
| SIrop4-F                  | CACC ATGAGTGCTTCTAGGTTTATA  |
| SIrop4-R                  | TCACAAGATAGAGCAGGCTTTCTGA   |
| SIrop5-F                  | CACC ATGAGTGCTTCAAGGTTTATC  |
| SIrop5-R                  | TCACAAAATAGAACATGCCTTTTGG   |
| SIrop6-F                  | CACC ATGAGCGCATCCAGGTTTCATC |
| SIrop6-R                  | TCACAAAATTGAGCAGGCCCTTTGG   |
| SIrop7-F                  | CACC ATGAGTGCTTCCAGGTTTATC  |
| SIrop7-R                  | TTATAGTTGATCACAATATCGAGCA   |
| SIrop8-F                  | CACC ATGACTACTGCTAGATTTCATC |
| SIrop8-R                  | TCATAGAATTGCACATAACGTCCTC   |
| SIrop9-F                  | CACC ATGAATAGTAGTACTAGTGCT  |
| SIrop9-R                  | TCAAAGTATCCAGCAGGCTTTGTGT   |
| Primers for RT-PCR        |                             |
| Primer name               | Sequence (5'-3')            |
| SIrop1-qPCR-F             | CTAGCAGATCATATGGGCTCAA      |
| SIrop1-qPCR-R             | GTTGAGTTTTAGAGCTGCACTC      |
| SIrop2-qPCR-F             | ACAACGCATATCTAGCTGATCA      |
| SIrop2-qPCR-R             | CTGCATTCTACATAAGCTGCAG      |
| SIrop3-qPCR-F             | TTCCCATCAATTCGGTCTCTAG      |
| SIrop3-qPCR-R             | TGTAGCAGAATTAGTCGCATCT      |
| SIrop4-qPCR-F             | GTTGTCCGTTTGATTATAGGCC      |
| SIrop4-qPCR-R             | ACACAACAACATTTAGCAGACG      |
| SIrop5-qPCR-F             | GTAAAGCCAGCTATGAAACGT       |
| SIrop5-qPCR-R             | TTGTTCCAACAAGCACTATTGG      |
| SIrop6-qPCR-F             | GTTTCTGTTTTCTTTTTGCGG       |
| SIrop6-qPCR-R             | CGAGGATAAAATAGAGTGGCCT      |
| SIrop7-qPCR-F             | CTTCTTCTTCGTTGGTTGACAG      |
| SIrop7-qPCR-R             | CGATGACCCACTTCTTATCAGA      |
| SIrop8-qPCR-F             | TAACCTCAGTGCAAATGTGGTG      |
| SIrop8-qPCR-R             | GACATCAGCTCCTCTGTAACCT      |

Table S1

Continued

| Primers for RT-PCR                  |                                          |    |
|-------------------------------------|------------------------------------------|----|
| Primer name                         | Sequence (5'-3')                         |    |
| SIrop9-qPCR-F                       | ACTTTGATCTAAGTCGCTGGAA                   |    |
| SIrop9-qPCR-R                       | AGCCAGCAATAAACTCAACAAG                   |    |
| SIUBQ7-qPCR-F                       | GATCGTATCAAGGAACGTGTTG                   |    |
| SIUBQ7-qPCR-R                       | CTTTAGCTGTCTTGTCATCTGC                   |    |
| Primers for Primers for mutagenesis |                                          |    |
| Primer name                         | Sequence (5'-3')                         |    |
| SIrop1-G15V-F                       | TGTAGGCGATGTTGCTGTTGGCAAGACCTGCATGCTCA   | CA |
| SIrop1-G15V-R                       | TGCCAACAGCAACATCGCCTACAGTTACACATTTGATG   |    |
| SIrop2-G15V-F                       | TGTAGGTGATGTAGCTGTTGGAAAGACATGTATGTTAA   |    |
| SIrop2-G15V-R                       | TTCCAACAGCTACATCACCTACAGTCACACATTTGATG   |    |
| SIrop3-G17V-F                       | GGTTGGTGTATGTGGCTGTTGGCAAGACTTGTATGCTTA  |    |
| SIrop3-G17V-R                       | TGCCAACAGCCACATCACCAACCGTGACACATTTGATG   |    |
| SIrop4-G15V-F                       | CGTGGGCGATGTAGCTGTGGGTAAAACCTTGCTTCTCA   |    |
| SIrop4-G15V-R                       | TACCCACAGCTACATCGCCACGGTAACACACTTTATA    |    |
| SIrop5-G15V-F                       | CGTCGGCGATGTTGCCGTTGGAAAGACGTGTCTCTTGA   |    |
| SIrop5-G15V-R                       | TTCCAACGGCAACATCGCCGACGGTAACACATTTGATA   |    |
| SIrop6-G15V-F                       | CGTTGGTGTATGTTGCTGTTGGAAAGACATGCCTCTTGA  |    |
| SIrop6-G15V-R                       | TTCCAACAGCAACATCACCAACGGTGACACACTTGATG   |    |
| SIrop7-G15V-F                       | AGTGGGTGATGTTGCTGTTGGAAAGACTTGTCTTTTGA   |    |
| SIrop7-G15V-R                       | TTCCAACAGCAACATCACCCACTGTAACACACTTGATA   |    |
| SIrop8-G15V-F                       | TGTTGGTGTATGTAGCTGTTGGGAAAACCTTGTATGCTAA |    |
| SIrop8-G15V-R                       | TCCCAACAGCTACATCACCAACAGTAACACATTTGATG   |    |
| SIrop9-G27V-F                       | TGTTGGAGATGTTGCTGTTGGAAAACTTGTCTTCTCA    |    |
| SIrop9-G27V-R                       | TTCCAACAGCAACATCTCCAACAGTAACACATTTGATG   |    |
| SIrop1-T20N-F                       | TGTTGGCAAGAACTGCATGCTCATTTGTTACACCAGTA   | DN |
| SIrop1-T20N-R                       | TGAGCATGCAGTTCTTGCCAACAGCACCATCGCCTACA   |    |
| SIrop2-T20N-F                       | TGTTGGAAAGAACTGTATGTTAATTTGTTACACTAATA   |    |
| SIrop2-T20N-R                       | TTAACATACAGTTCTTTCCAACAGCTCCATCACCTACA   |    |
| SIrop3-T22N-F                       | TGTTGGCAAGAATTGTATGCTTATTTGCTATACCAGTA   |    |
| SIrop3-T22N-R                       | TAAGCATACAATTCTTGCCAACAGCCCCATCACCAACC   |    |
| SIrop4-T20N-F                       | TGTGGGTAAAAATTGTCTTCTCATTTTCGTATACCAGCA  |    |
| SIrop4-T20N-R                       | TGAGAAGACAATTTTTACCCACAGCTCCATCGCCACG    |    |
| SIrop5-T20N-F                       | CGTTGGAAAGAACTGTCTCTTGATTTCTTACACCAGCA   |    |
| SIrop5-T20N-R                       | TCAAGAGACAGTTCTTTCCAACGGCACCATCGCCGACG   |    |
| SIrop6-T20N-F                       | TGTTGGAAAGAACTGCCTCTTGATTTCTTACACCAGCA   |    |
| SIrop6-T20N-R                       | TCAAGAGGCAGTTCTTTCCAACAGCACCATCACCAACG   |    |

Table S1

Continued

| Primers for Primers for mutagenesis |                                              |            |
|-------------------------------------|----------------------------------------------|------------|
| Primer name                         | Sequence (5'-3')                             |            |
| SIRop7-T20N-F                       | TGTTGGAAAGAATTGTCTTTTGATTTCTTACACCAGCA       | <b>DN</b>  |
| SIRop7-T20N-R                       | TCAAAAGACAATTCTTTCCAACAGCACCATCACCCACT       |            |
| SIRop8-T20N-F                       | TGTTGGGAAAAATTGTATGCTAATTTCATACACTAGTA       |            |
| SIRop8-T20N-R                       | TTAGCATACAATTTTTCCCAACAGCTCCATCACCAACA       |            |
| SIRop9-T32N-F                       | TGTTGGAAAAAATTGTCTTCTCATCTCCTACACTAGCA       |            |
| SIRop9-T32N-R                       | TGAGAAGACAATTTTTTCCAACAGCACCATCTCCAACA       |            |
| SIRop3-2B-F                         | GAAAAACAAGAAGAGGGATGTCTCATGAATGTGATGTGCG     | <b>-2B</b> |
| SIRop3-2B-R                         | TGAGACATCCCTCTTCTTGTTTTTCTTCTCCTTTTGCTTT     |            |
| SIRop3-3B-F                         | GCAAAAGGAGGAGGAAGAACAACGTCGGGGATGTCTCATGAATG | <b>-3B</b> |
| SIRop3-3B-R                         | CCCGACGTTGTTCTTCTCCTCCTTTTGCTTTTGTTGGTGGCTTG |            |
| SIRop3+L-F                          | TTGTTTAAAGCTATGAAAGGGTGGGCGCGCCGACCCAG       | <b>+L</b>  |
| SIRop3+L-R                          | CACCCTTTCATAGCTTTAAACAAACGAGCTTCCTTCCG       |            |
